# Supplementary material
Source: publisher figshare collection journal article supplement (https://acs.figshare.com/ndownloader/files/4183360)
Supplement: Supplementary file 1 [file 4183360]

## SUPPORTING INFORMATION

### Identification of an acyl-enzyme intermediate in a *meta*-cleavage product hydrolase reveals the versatility of the catalytic triad

Antonio C. Ruzzini<sup>†,‡</sup>, Subhangi Ghosh<sup>§,‡</sup>, Geoff P. Horsman<sup>‡</sup>, Leonard J. Foster<sup>†</sup>, Jeffrey T. Bolin<sup>\*,§</sup>,  
Lindsay D. Eltis<sup>\*,†,||</sup>

<sup>†</sup> Department of Biochemistry and Molecular Biology, University of British Columbia, BC, Canada

<sup>§</sup> Purdue Cancer Research Center and Markey Center for Structural Biology, Department of  
Biological Sciences, Purdue University, West Lafayette, IN, USA

<sup>||</sup> Department of Microbiology and Immunology, University of British Columbia, BC, Canada

#### Present address

<sup>‡</sup> Department of Chemistry, Wilfrid Laurier University, Waterloo, Ontario, Canada

#### Author Contributions

<sup>‡</sup> These authors contributed equally to this work.

#### Corresponding authors

Jeffrey T Bolin – [jtb@purdue.edu](mailto:jtb@purdue.edu)

Lindsay D Eltis – [leltis@mail.ubc.ca](mailto:leltis@mail.ubc.ca)

#### Table of Contents

#### Experimental Section

Analysis of steady-state kinetic data S2

#### Results

Table S1. Properties of the crystals, diffraction data, and refinement statistics S2

Table S2. Results of restrained refinements of ES complexes assuming different isomers of HOPDA S3

Figure S1. BphD H265Q:HOPDA<sup>2-</sup> protomer and secondary HOPDA<sup>2-</sup> binding site S3

Figure S2. Whole protein LC ESI/MS analysis of BphD WT and H265Q reacted with excess HOPDA S4

Table S3. *b*-series ion fragment matching results from MASCOT search S5

Figure S3. Representative EI/GC/MS analysis of benzoate, HOPDA, and BphD-catalyzed reactions in H<sub>2</sub><sup>18</sup>O S6

Table S4. Example of modeling EI/GC/MS data to <sup>18</sup>O incorporation: WT + HOPDA reaction S7

Table S5. Relative abundance of benzoate and HOPDA ion fragments as analyzed by EI GC/MS S8

Figure S4. Representative stopped-flow experiments monitoring turnover of HOPDA by BphD H265Q S9

Table S6. Kinetic binding data of S112A variants mixed in 2:1 molar excess to HOPDA S10

Figure S5. S112A/H265Q:HOPDA<sup>2-</sup> complex and representative binding kinetics S11

Figure S6. Representative pre-steady state burst of HPD formation during turnover by BphD WT S12

Table S7. Estimated transition state stabilization by the binding energy of MCP hydrolase side chains S12

Figure S7. Comparison of the acetylated-DAC-AT:substrate complex and the benzoylated BphD H265Q S13

## EXPERIMENTAL SECTION

**Analysis of steady-state kinetic data.** Contributions of individual residues to transition state stabilization were estimated from previously measured steady-state kinetic parameters of BphD and MhpC. The analysis was performed as previously described for a C35G variant of tyrosyl-tRNA synthetase<sup>1</sup>. Briefly, the specificity constants were compared using the following equation:  $\Delta G_R = RT \ln[(k_{cat}/K_m)_{mut} / (k_{cat}/K_m)_{WT}]$ , which assumes that the transition state energy is unaffected by substitution, and that the mutated side-chains do not affect productive binding of a second substrate, in this case H<sub>2</sub>O.

## RESULTS

Table S1. Properties of the crystals, diffraction data, and refinement statistics

| Crystal properties and diffraction data               |                                   |                                   |                                                       |                                                        |
|-------------------------------------------------------|-----------------------------------|-----------------------------------|-------------------------------------------------------|--------------------------------------------------------|
| Structure                                             | S112A/H265Q                       | S112A/H265Q:HOPDA                 | H265Q                                                 | H265Q:HOPDA                                            |
| PDB ID                                                | 3V1L                              | 3V1M                              | 3V1K                                                  | 3V1N                                                   |
| Crystal growth conditions                             | 2.4 M sodium malonate, pH 6.8     | 2.4 M sodium malonate, pH 7.0     | 2.4 M sodium malonate, pH 6.6, 3% v/v ethylene glycol | 2.4 M sodium malonate, pH 6.4, 10 mM CaCl <sub>2</sub> |
| Beamline                                              | GM/CA-CAT                         | LS-CAT                            | GM/CA-CAT                                             | GM/CA-CAT                                              |
|                                                       | 23-ID-B                           | 21-ID-F                           | 23-ID-D                                               | 23-ID-D                                                |
| Wavelength (Å)                                        | 1.00                              | 0.98                              | 1.00                                                  | 1.00                                                   |
| Resolution range <sup>a</sup> (Å)                     | 83.1 - 2.1                        | 82.8 - 1.9                        | 117.8 - 2.1                                           | 82.5 - 1.6                                             |
| Space Group                                           | <i>I</i> 4 <sub>1</sub> 22        | <i>I</i> 4 <sub>1</sub> 22        | <i>P</i> 6 <sub>4</sub>                               | <i>I</i> 4 <sub>1</sub> 22                             |
| Cell Dimensions (Å)                                   | <i>a</i> = 117.5, <i>c</i> = 87.8 | <i>a</i> = 117.1, <i>c</i> = 87.2 | <i>a</i> = <i>b</i> = 135.9, <i>c</i> = 65.8          | <i>a</i> = 116.6, <i>c</i> = 87.6                      |
| Unique reflections                                    | 18,100                            | 23,358                            | 39,208                                                | 40,883                                                 |
| Multiplicity <sup>a</sup>                             | 7.6 (3.2)                         | 8.1 (5.0)                         | 10.4 (8.2)                                            | 14.0 (11.1)                                            |
| Completeness <sup>a</sup> (%)                         | 97.8 (91)                         | 99.4 (97)                         | 99.9 (100)                                            | 99.9 (99.7)                                            |
| <i>R</i> <sub>symm</sub> <sup>a</sup> (%)             | 12.6 (36.7)                       | 7.5 (38.9)                        | 12.2 (94.8)                                           | 7.0 (82.4)                                             |
| Mean <sup>a</sup> <i>I</i> /σ <sup>2</sup>            | 17.5 (2.7)                        | 24.9 (3.8)                        | 21.0 (2.6)                                            | 37.9 (2.8)                                             |
| Refinement                                            |                                   |                                   |                                                       |                                                        |
| <i>R</i> <sub>factor</sub> / <i>R</i> <sub>free</sub> | 0.18 / 0.22                       | 0.18 / 0.22                       | 0.20 / 0.24                                           | 0.18 / 0.21                                            |
| Model content (atoms)                                 |                                   |                                   |                                                       |                                                        |
| Non-hydrogen atoms                                    | 2401                              | 2382                              | 4623                                                  | 2446                                                   |
| Protein <sup>b</sup>                                  | 2238                              | 2238                              | 4490                                                  | 2238                                                   |
| Malonate/HOPDA/benzoyl <sup>c</sup>                   | 7 / 0 / 0                         | 7 / 16 (0.6) / 0                  | 7 / 0 / 0                                             | 7 / 16 (0.7) / 8                                       |
| Water oxygens                                         | 156                               | 116                               | 126                                                   | 177                                                    |
| Average <i>B</i> <sub>factors</sub> (Å <sup>2</sup> ) |                                   |                                   |                                                       |                                                        |
| all atoms                                             | 23.9                              | 25.7                              | 42.0                                                  | 22.0                                                   |
| protein <sup>b</sup>                                  | 23.4                              | 25.5                              | 28.6 <sup>A</sup> / 56.0 <sup>B</sup>                 | 21.4                                                   |
| malonate/HOPDA/benzoyl                                | 27.4 / NA / NA                    | 29.4 / 35.0 / NA                  | 42.9 / NA / NA                                        | 25.2 / 28.1 / 21.6                                     |
| waters                                                | 30.5                              | 32.0                              | 43.5                                                  | 30.0                                                   |
| rmsd <sup>d</sup> bond lengths (Å)                    | 0.01                              | 0.01                              | 0.01                                                  | 0.01                                                   |
| rmsd bond angles (degrees)                            | 1.3                               | 1.2                               | 1.2                                                   | 1.4                                                    |

*a* – Values for highest resolution bin in parentheses, *b* – All chains include residues 4 - 286 except chain A of H265Q, which includes residues 2 - 286. Atoms modeled in two conformations are counted once. *c* – Each ligand was modeled at full occupancy unless otherwise stated in parentheses; one molecule of malonate = 7 atoms, HOPDA = 16 atoms, benzoyl group = 8 atoms. *d* – For the H265Q structure, values for distinct monomers A and B are indicated by superscripts. *e* – rmsd = root-mean-square deviation from restraint targets

Table S2. Results of restrained refinements of ES complexes assuming different isomers of HOPDA<sup>a</sup>

| Bond Properties |            | HOPDA isomer <sup>b,c</sup>                                                       |       |                                                                                    |       |                                                                                     |       |
|-----------------|------------|-----------------------------------------------------------------------------------|-------|------------------------------------------------------------------------------------|-------|-------------------------------------------------------------------------------------|-------|
|                 |            | (2 <i>E</i> ,4 <i>E</i> )-2-hydroxy-6-oxo-<br>(2-enol)                            |       | (3 <i>E</i> )-2,6-dioxo-<br>(2-keto)                                               |       | (3 <i>E</i> ,5 <i>Z</i> )-2-oxo-6-oxido-                                            |       |
|                 |            | 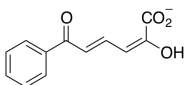 |       |  |       |  |       |
| Variant         |            | S112A/H265Q                                                                       | H265Q | S112A/H265Q                                                                        | H265Q | S112A/H265Q                                                                         | H265Q |
| C1-C2           | Initial    | -136                                                                              | 53    | -171                                                                               | 52    | -171                                                                                | 52    |
|                 | T-refined  | -171                                                                              | 53    |                                                                                    |       |                                                                                     |       |
|                 | TP-refined | -149                                                                              | 57    | -145                                                                               | 61    | -146                                                                                | 63    |
| C2-C3           | Initial    | -4                                                                                | -166  |                                                                                    | -165  |                                                                                     | -165  |
|                 | T-refined  | 64                                                                                | -165  | 64                                                                                 |       | 64                                                                                  |       |
|                 | TP-refined | -2                                                                                | -166  | 5                                                                                  | -144  | -6                                                                                  | -126  |
| C3-C4           | Initial    | -170                                                                              | 176   | 171                                                                                | 175   | 171                                                                                 | 175   |
|                 | T-refined  | 171                                                                               | 175   |                                                                                    |       |                                                                                     |       |
|                 | TP-refined | -173                                                                              | 149   | -180                                                                               | 169   | -177                                                                                | 171   |
| C4-C5           | Initial    | 177                                                                               | -109  | 134                                                                                | -110  | 134                                                                                 | -110  |
|                 | T-refined  | 134                                                                               | -110  |                                                                                    |       |                                                                                     |       |
|                 | TP-refined | 179                                                                               | -175  | 161                                                                                | -131  | 175                                                                                 | -152  |
| C5-C6           | Initial    | 168                                                                               | -175  | 162                                                                                | -173  | 162                                                                                 | -173  |
|                 | T-refined  | 162                                                                               | -173  |                                                                                    |       |                                                                                     |       |
|                 | TP-refined | 171                                                                               | -142  | 178                                                                                | -179  | 180                                                                                 | 177   |
| C6-CB1          | Initial    | 146                                                                               | 173   | 149                                                                                | 173   | 149                                                                                 | 173   |
|                 | T-refined  | 149                                                                               | 173   |                                                                                    |       |                                                                                     |       |
|                 | TP-refined | 141                                                                               | -136  | 146                                                                                | 176   | 146                                                                                 | -180  |

<sup>a</sup> – Initial is the value of the angle of the model prior to any refinement. T-refined is the value after tightly restrained torsion angle refinement. TP-refined is the value after refinement restraining both torsion and planarity. All angles are reported in degrees. <sup>b</sup> – Historical tautomer nomenclature is written in parentheses. <sup>c</sup> – The (3*E*,5*Z*)-2-oxo-6-oxido isomer was built into the final model for structures of both ES complexes.

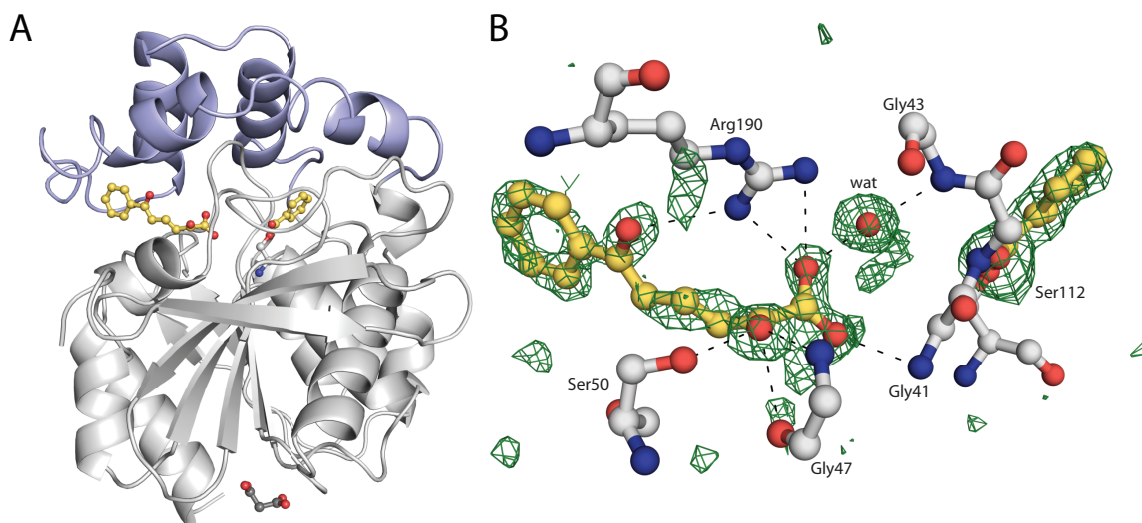

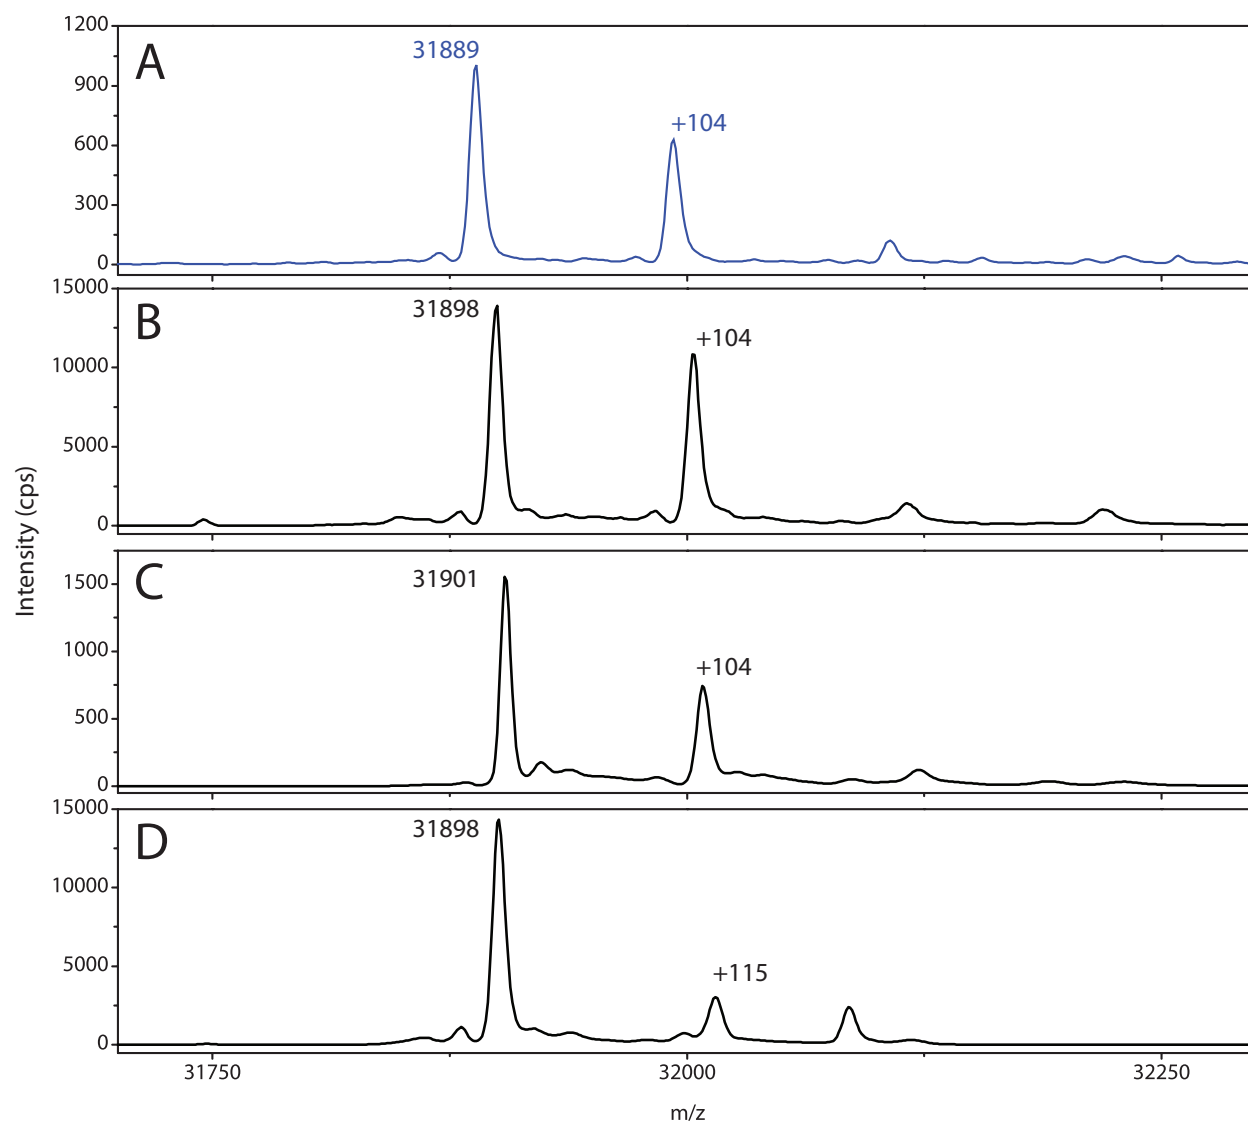

Figure S2. Whole protein LC ESI/MS analysis of H265Q (blue) and WT (black) BphD reacted with HOPDA. Reactions contained 4  $\mu$ M enzyme and 20  $\mu$ M HOPDA in potassium phosphate ( $I = 0.1$  M), pH 7.5 at 25  $^{\circ}$ C. (A) BphD H265Q-catalyzed reaction quenched after 600 ms. The peak areas indicate that ~40% of the enzyme was acylated. (B) WT-catalyzed reaction quenched after 200 ms. Approximately 45% of the enzyme was acylated. (C) WT-catalyzed reaction quenched after 1 s. Approximately 30% of the enzyme was acylated. The apparent mass shift in the spectrum (+3) was due to the higher noise associated with this dataset. (D) WT-catalyzed reaction quenched after 10 s. No peak corresponding to acylated BphD was detected. The +115 peak is consistent with a non-covalent enzyme:HPD adduct, a reaction product that competitively inhibits BphD.

Table S3. *b*-series ion fragment matches to a BphD peptide analyzed by ESI/MS/MS<sup>a,b,c</sup>

| <i>b</i> -series ion      | Peptide             |                     |                     |
|---------------------------|---------------------|---------------------|---------------------|
|                           | WT (unmodified)     | WT S112-benzoyl     | H265Q S112-benzoyl  |
| <i>b</i> <sup>9+</sup>    | 977.52 / 977.5163   | 977.54 / 977.5163   | 977.51 / 977.5163   |
| <i>b</i> <sup>10+</sup>   | 1091.58 / 1091.5592 | 1091.58 / 1091.5592 | 1091.57 / 1091.5592 |
| <i>b</i> <sup>11+</sup>   | 1178.61 / 1178.5913 |                     | 1282.64 / 1282.6175 |
| <i>b</i> <sup>12+</sup>   | 1309.66 / 1309.6317 | 1413.69 / 1413.6580 | 1413.73 / 1413.6580 |
| <i>b</i> <sup>13+</sup>   | 1366.65 / 1366.6532 | 1470.69 / 1470.6794 |                     |
| <i>b</i> <sup>14+</sup>   | 1423.67 / 1423.6747 | 1527.73 / 1527.7009 |                     |
| <i>b</i> <sup>15+</sup>   | 1494.74 / 1494.7118 | 1598.74 / 1598.7380 |                     |
| <i>b</i> <sup>17+</sup>   | 1666.82 / 1666.7966 |                     |                     |
| <i>b</i> <sup>11++</sup>  | 641.83 / 641.8124   | 589.81 / 589.7993   |                     |
| <i>b</i> <sup>13++</sup>  | 735.85 / 735.8434   |                     | 735.83 / 735.8434   |
| <i>b</i> <sup>14++</sup>  | 764.36 / 764.3541   | 712.34 / 712.3410   | 764.33 / 764.3541   |
| <i>b</i> <sup>15++</sup>  | 764.85 / 799.8726   |                     |                     |
| <i>b</i> <sup>17++</sup>  | 885.97 / 885.9150   |                     |                     |
| <i>b</i> <sup>19++</sup>  | 999.95 / 999.4785   |                     |                     |
| <i>b</i> <sup>11*++</sup> | 581.30 / 581.2860   |                     |                     |
| <i>b</i> <sup>16*++</sup> | 789.89 / 789.8701   | 841.91 / 841.8832   |                     |
| <i>b</i> <sup>17*++</sup> |                     | 877.43 / 877.4018   |                     |
| <i>b</i> <sup>11o+</sup>  | 1160.61 / 1160.5807 |                     |                     |
| <i>b</i> <sup>16o+</sup>  | 1577.72 / 1577.7489 |                     |                     |
| <i>b</i> <sup>11o++</sup> | 580.80 / 580.7940   |                     |                     |
| <i>b</i> <sup>16o++</sup> | 789.39 / 789.3781   | 841.41 / 841.3912   | 841.37 / 841.3912   |
| <i>b</i> <sup>17o++</sup> |                     | 876.91 / 876.9098   | 876.91 / 876.9098   |
| Search Result Statistics  |                     |                     |                     |
| Ions score                | 85                  | 63                  | 50                  |
| Expect Value              | 3.8 E-6             | 0.00057             | 0.022               |
| Matches (out of 212)      | 25                  | 34                  | 23                  |
| RMS error (ppm)           | 207                 | 220                 | 276                 |

*a* – values of the observed fragments based on manual inspection of raw data and fits to Gaussian peaks followed by MASCOT match results

*b* – MASCOT search of *B. xenovorans* LB400 proteins resulted in a match to the BphD peptide, DIDRAHLVGNSMGGATALNF

*c* – Symbols \* and ° indicate ions with an additional loss of NH<sub>3</sub> and H<sub>2</sub>O, respectively.

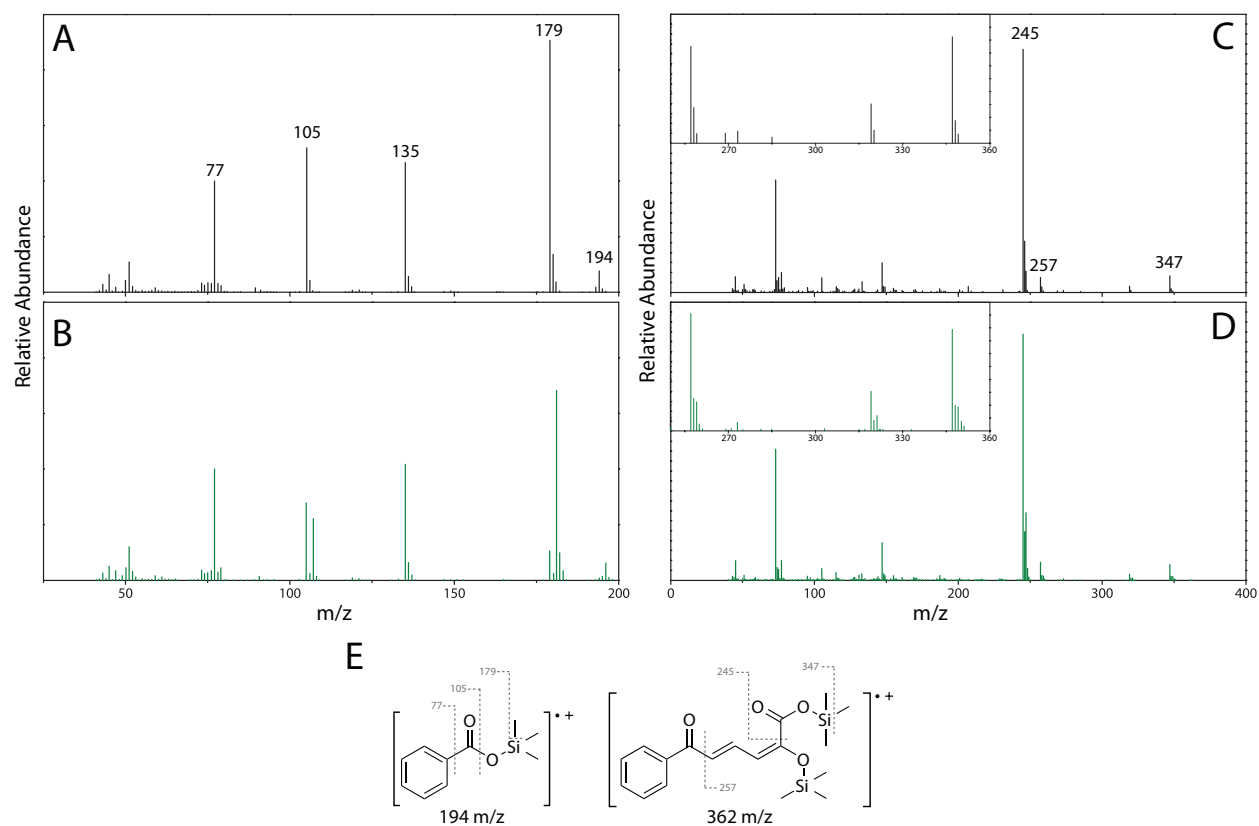

Figure S3. Representative EI/GC/MS analysis of (A) benzoate in  $\text{H}_2\text{O}$ , (B) benzoate derived from BphD-mediated hydrolysis of HOPDA in  $\text{H}_2^{18}\text{O}$ , (C) HOPDA in  $\text{H}_2\text{O}$ , and (D) HOPDA in  $\text{H}_2^{18}\text{O}$ . Inset panels (C and D) highlight the lower intensity HOPDA ion fragments. (E) Illustration of the parent ions and notable fragments.

Table S4. Example of modeling EI/GC/MS data to <sup>18</sup>O incorporation: WT + HOPDA reaction

| Observed relative abundance of ions from EI/GC/MS (%)                                            |             |               |               |               |               |               |                                |
|--------------------------------------------------------------------------------------------------|-------------|---------------|---------------|---------------|---------------|---------------|--------------------------------|
| m/z                                                                                              | 179         | 180           | 181           | 182           | 183           | 184           |                                |
|                                                                                                  | [M]         | [M+1]         | [M+2]         | [M+3]         | [M+4]         | [M+5]         |                                |
| Control <sup>a</sup>                                                                             | 83.5        | 12.4          | 3.9           | 0.35          |               |               |                                |
| WT + HOPDA <sup>b</sup>                                                                          | 12          | 2.7           | 71            | 10.7          | 3.6           | 0.3           |                                |
| Modeling the relative abundance (R.A.) of benzoate species in the sample (%)                     |             |               |               |               |               |               |                                |
| Model 1: Two species accounting for a single <sup>18</sup> O incorporation event                 |             |               |               |               |               |               |                                |
|                                                                                                  | R.A.<br>[M] | R.A.<br>[M+1] | R.A.<br>[M+2] | R.A.<br>[M+3] | R.A.<br>[M+4] | R.A.<br>[M+5] | Average<br>R.A. <sup>c,d</sup> |
| <sup>16</sup> O/ <sup>16</sup> O                                                                 | 14          | 22            | 16            | 14            |               |               | 15 ± 1                         |
| <sup>16</sup> O/ <sup>18</sup> O                                                                 |             |               | 84            | 86            | 92            | 86            | 85 ± 1                         |
| Model 2: Three species including 3% of doubly <sup>18</sup> O-incorporated benzoate <sup>e</sup> |             |               |               |               |               |               |                                |
| <sup>16</sup> O/ <sup>16</sup> O                                                                 | 14          | 22            | 16            | 14            |               |               | 15 ± 1                         |
| <sup>16</sup> O/ <sup>18</sup> O                                                                 |             |               | 84            | 86            | 28            | -21           | 82 ± 3                         |

*a* – Control values represent the average of all benzoate ion fragments observed in H<sub>2</sub>O

*b* – Benzoate derived from HOPDA incubated with WT BphD for 20 minutes without any pre-incubation

*c* – The relative abundance of each species (<sup>16</sup>O/<sup>18</sup>O and <sup>18</sup>O/<sup>18</sup>O) was calculated from the observed intensity of each ion (Obs) from the WT reaction and the control (Co) as follows:

$$\text{R.A. } [M]_{16O/16O} = [M]_{\text{Obs}}/[M]_{\text{Co}}$$

$$\text{R.A. } [M+1]_{16O/16O} = [M+1]_{\text{Obs}}/[M+1]_{\text{Co}}$$

$$\text{R.A. } [M+2]_{16O/16O} = ([M]_{\text{Co}} - [M+2]_{\text{Obs}})/([M]_{\text{Co}} - [M+2]_{\text{Co}})$$

$$\text{R.A. } [M+3]_{16O/16O} = ([M+1]_{\text{Co}} - [M+3]_{\text{Obs}})/([M+1]_{\text{Co}} - [M+3]_{\text{Co}})$$

$$\text{R.A. } [M+4]_{16O/16O} = ([M+2]_{\text{Co}} - [M+4]_{\text{Obs}})/([M+2]_{\text{Co}} - [M+4]_{\text{Co}})$$

$$\text{R.A. } [M+5]_{16O/16O} = ([M+3]_{\text{Co}} - [M+5]_{\text{Obs}})/([M+3]_{\text{Co}} - [M+5]_{\text{Co}})$$

$$\text{R.A. of } [M+N]_{16O/18O} = 1 - [M+N]_{16O/16O}$$

*d* – The averages and errors were weighted based on fragment ion intensity

*e* – The calculation in Table S4 used a model in which 3% of the benzoate contains two equivalents of <sup>18</sup>O. Ion fragments derived from this species only contribute to the observed signals at M+4 and M+5; no M+6 or M+7 ions were observed.

Table S5. Relative abundance of benzoate and HOPDA ion fragments as analyzed by EI GC/MS

|                            |            |                                | Relative abundance (%) <sup>a</sup> of benzoate ion fragments (m/z) |              |              |              |              | <sup>18</sup> O incorporation <sup>b</sup> |           |
|----------------------------|------------|--------------------------------|---------------------------------------------------------------------|--------------|--------------|--------------|--------------|--------------------------------------------|-----------|
| Sample and Incubation time |            |                                | 105<br>[M]                                                          | 106<br>[M+1] | 107<br>[M+2] | 108<br>[M+3] | 109<br>[M+4] |                                            |           |
| benzoate                   | 300 min    | H <sub>2</sub> O               | 92 ± 1                                                              | 7 ± 1        | 1.0 ± 0.1    |              |              |                                            |           |
|                            |            | H <sub>2</sub> <sup>18</sup> O | 92.2 ± 0.2                                                          | 6.7 ± 0.1    | 1.1 ± 0.1    |              |              | ND                                         |           |
| WT +                       | 300 min    | H <sub>2</sub> O               | 92.3 ± 0.1                                                          | 6.6 ± 0.2    | 1.1 ± 0.1    |              |              |                                            |           |
| benzoate                   |            | H <sub>2</sub> <sup>18</sup> O | 91.5 ± 0.7                                                          | 7.2 ± 0.5    | 1.3 ± 0.2    |              |              | ND                                         |           |
| WT +                       | 20 min     | H <sub>2</sub> O               | 92.2 ± 0.4                                                          | 6.8 ± 0.8    | 1.0 ± 0.4    |              |              |                                            |           |
| HOPDA                      |            | H <sub>2</sub> <sup>18</sup> O | 53 ± 2                                                              | 4.9 ± 0.4    | 39 ± 3       | 2.7 ± 0.2    | 0.3 ± 0.2    | 42 ± 1%                                    |           |
| WT +                       | 5 min PI   | H <sub>2</sub> O               | 92 ± 2                                                              | 7 ± 1        | 1.0 ± 0.3    |              |              |                                            |           |
| HOPDA                      | 20 min rxn | H <sub>2</sub> <sup>18</sup> O | 52.9 ± 0.3                                                          | 5.5 ± 0.9    | 38 ± 1       | 3.1 ± 0.2    | 0.17 ± 0.02  | 42 ± 2%                                    |           |
| WT +                       | 20 min PI  | H <sub>2</sub> O               | 91 ± 2                                                              | 8 ± 1        | 0.9 ± 0.4    |              |              |                                            |           |
| HOPDA                      | 20 min rxn | H <sub>2</sub> <sup>18</sup> O | 52.5 ± 0.6                                                          | 4.8 ± 0.3    | 38.5 ± 0.4   | 3.8 ± 0.1    | 0.29 ± 0.03  | 43 ± 2%                                    |           |
|                            |            |                                | 179<br>[M]                                                          | 180<br>[M+1] | 181<br>[M+2] | 182<br>[M+3] | 183<br>[M+4] | 184<br>[M+5]                               |           |
| benzoate                   | 300 min    | H <sub>2</sub> O               | 83.2 ± 0.6                                                          | 12.9 ± 0.5   | 3.4 ± 0.1    | 0.44 ± 0.08  |              |                                            |           |
|                            |            | H <sub>2</sub> <sup>18</sup> O | 83.1 ± 0.5                                                          | 12.4 ± 0.3   | 4.1 ± 0.1    | 0.4 ± 0.2    |              |                                            | ND        |
| WT +                       | 300 min    | H <sub>2</sub> O               | 84.1 ± 0.4                                                          | 11.9 ± 0.4   | 3.6 ± 0.1    | 0.31 ± 0.01  |              |                                            |           |
| benzoate                   |            | H <sub>2</sub> <sup>18</sup> O | 83 ± 0.2                                                            | 12.3 ± 0.1   | 4.3 ± 0.1    | 0.4 ± 0.04   |              |                                            | ND        |
| WT +                       | 20 min     | H <sub>2</sub> O               | 84 ± 1                                                              | 12 ± 1       | 3.9 ± 0.1    | 0.3 ± 0.1    |              |                                            |           |
| HOPDA                      |            | H <sub>2</sub> <sup>18</sup> O | 12 ± 1                                                              | 2.7 ± 0.1    | 71 ± 2       | 10.7 ± 0.5   | 3.6 ± 0.1    | 0.3 ± 0.1                                  | 85 ± 1%   |
| WT +                       | 5 min PI   | H <sub>2</sub> O               | 82.7 ± 0.9                                                          | 12 ± 1       | 4.4 ± 0.5    | 0.4 ± 0.1    | 0.23 ± 0.01  |                                            |           |
| HOPDA                      | 20 min rxn | H <sub>2</sub> <sup>18</sup> O | 14 ± 3                                                              | 3.9 ± 0.3    | 68 ± 2       | 11 ± 1       | 3.1 ± 0.1    | 0.3 ± 0.2                                  | 80 ± 2%   |
| WT +                       | 20 min PI  | H <sub>2</sub> O               | 82.7 ± 0.1                                                          | 12.8 ± 0.4   | 4.0 ± 0.4    | 0.33 ± 0.07  | 0.12 ± 0.04  |                                            |           |
| HOPDA                      | 20 min rxn | H <sub>2</sub> <sup>18</sup> O | 16.7 ± 0.4                                                          | 3.3 ± 0.2    | 65 ± 1       | 10.0 ± 0.1   | 4 ± 1        | 0.5 ± 0.2                                  | 79 ± 2%   |
|                            |            |                                | 193<br>[M-1]                                                        | 194<br>[M]   | 195<br>[M+1] | 196<br>[M+2] | 197<br>[M+3] | 198<br>[M+4]                               |           |
| benzoate                   | 300 min    | H <sub>2</sub> O               | 15.7 ± 0.1                                                          | 70.2 ± 0.7   | 11.2 ± 0.3   | 3 ± 1        |              |                                            |           |
|                            |            | H <sub>2</sub> <sup>18</sup> O | 18 ± 2                                                              | 65.6 ± 0.4   | 12.6 ± 0.1   | 3 ± 1        |              |                                            | ND        |
| WT +                       | 300 min    | H <sub>2</sub> O               | 15.5 ± 0.3                                                          | 69 ± 1       | 12 ± 2       | 4.0 ± 0.7    |              |                                            |           |
| benzoate                   |            | H <sub>2</sub> <sup>18</sup> O | 14.3 ± 0.8                                                          | 69.5 ± 0.3   | 11.8 ± 0.3   | 3.9 ± 0.4    | 0.39 ± 0.06  |                                            | ND        |
| WT +                       | 20 min     | H <sub>2</sub> O               | 17 ± 5                                                              | 66 ± 1       | 11 ± 2       | 5 ± 1        |              |                                            |           |
| HOPDA                      |            | H <sub>2</sub> <sup>18</sup> O | 3 ± 1                                                               | 11 ± 4       | 15 ± 2       | 57 ± 8       | 11 ± 2       | 2.7 ± 0.8                                  | 85 ± 4 %  |
| WT +                       | 5 min PI   | H <sub>2</sub> O               | 16 ± 2                                                              | 69 ± 2       | 11 ± 4       | 3 ± 5        |              |                                            |           |
| HOPDA                      | 20 min rxn | H <sub>2</sub> <sup>18</sup> O | 3.0 ± 0.4                                                           | 15 ± 1       | 12 ± 2       | 55 ± 1       | 11.5 ± 0.8   | 3.0 ± 0.9                                  | 72 ± 9 %  |
| WT +                       | 20 min PI  | H <sub>2</sub> O               | 14 ± 3                                                              | 71 ± 1       | 10.7 ± 0.1   | 5 ± 1        |              |                                            |           |
| HOPDA                      | 20 min rxn | H <sub>2</sub> <sup>18</sup> O | 4 ± 1                                                               | 10 ± 1       | 12.5 ± 0.4   | 59 ± 2       | 10 ± 1       | 4.4 ± 0.1                                  | 80 ± 10 % |
|                            |            |                                | 245<br>[M]                                                          | 246<br>[M+1] | 247<br>[M+2] | 248<br>[M+3] | 249<br>[M+4] | 250<br>[M+5]                               |           |
| HOPDA                      | 20 min     | H <sub>2</sub> O               | 78 ± 2                                                              | 16.0 ± 0.2   | 5 ± 2        | 0.5 ± 0.2    |              |                                            |           |
|                            |            | H <sub>2</sub> <sup>18</sup> O | 65.0 ± 0.1                                                          | 12.7 ± 0.2   | 17.9 ± 0.1   | 3.2 ± 0.1    | 1.0 ± 0.2    | 0.12 ± 0.01                                | 18 ± 1%   |
|                            |            |                                | 257<br>[M]                                                          | 258<br>[M+1] | 259<br>[M+2] | 260<br>[M+3] | 261<br>[M+4] |                                            |           |
| HOPDA                      | 20 min     | H <sub>2</sub> O               | 71 ± 5                                                              | 22 ± 5       | 6.7 ± 0.1    |              |              |                                            |           |
|                            |            | H <sub>2</sub> <sup>18</sup> O | 62.3 ± 0.3                                                          | 15 ± 3       | 18 ± 8       | 3.1 ± 0.1    | 1.1 ± 0.1    |                                            | 17 ± 1 %  |
|                            |            |                                | 347<br>[M]                                                          | 348<br>[M+1] | 349<br>[M+2] | 350<br>[M+3] | 351<br>[M+4] |                                            |           |
| HOPDA                      | 20 min     | H <sub>2</sub> O               | 73 ± 6                                                              | 18 ± 2       | 8 ± 2        | 1 ± 1        |              |                                            |           |
|                            |            | H <sub>2</sub> <sup>18</sup> O | 58 ± 3                                                              | 17 ± 2       | 16 ± 2       | 6.3 ± 0.8    | 2 ± 1        |                                            | 17 ± 5%   |

<sup>a</sup> – errors for relative abundance measurements are a standard deviation from two replicates

<sup>b</sup> – errors for <sup>18</sup>O incorporation represent the root mean square error from fitting the experimentally observed data to a single <sup>18</sup>O incorporation or to a model that accounts for 2% incorporation of a second <sup>18</sup>O equivalent in parentheses

<sup>c</sup> – overall rms error based on weighted residual plot analysis, where residual = predicted % intensity from model – observed value



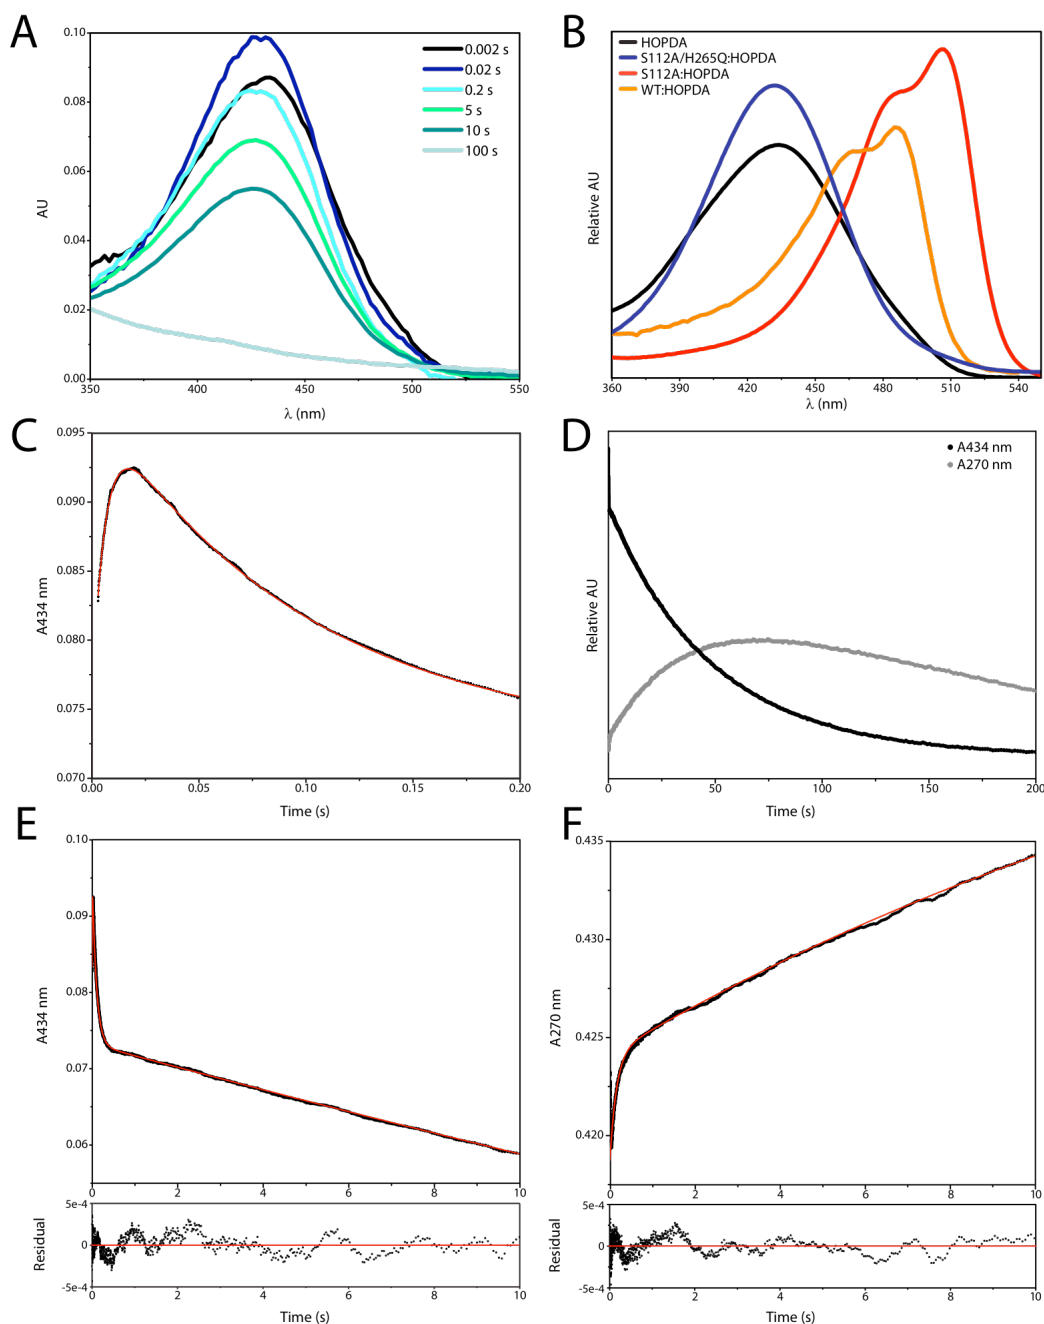

Figure S4. Representative stopped-flow experiments performed in potassium phosphate ( $I = 0.1$  M), pH 7.5 at 25 °C. (A) Turnover of 4  $\mu$ M HOPDA by 8  $\mu$ M BphD H265Q monitored using a photodiode array (note that HOPDAs photodecay under these conditions causing the apparent acceleration of rate constants). (B) The visible absorption spectra of ES complexes in solution. (C) Expanded view of the first 0.2 s during turnover of 4  $\mu$ M HOPDA by 8  $\mu$ M BphD H265Q. (D) Turnover of 4  $\mu$ M HOPDA by 8  $\mu$ M BphD H265Q monitored for 200 s, the normalized relative  $\Delta A_{434}$  nm and  $\Delta A_{270}$  nm are shown in black and grey, respectively, in order to demonstrate the reactions goes to completion under these conditions. (E) Turnover of 4  $\mu$ M HOPDA by 8  $\mu$ M BphD H265Q monitored at 434 nm for 10 s. Traces were fit from 0.003 to 10 s with a triple exponential equation (fit in red). The residual is shown below. (F) Turnover of 4  $\mu$ M HOPDA by 8  $\mu$ M BphD H265Q monitored at 270 nm for 10 s. Traces were fit from 0.02 to 10 s with a triple exponential equation (fit in red). The residual is shown below.

Table S6. Kinetic binding data of S112A variants mixed in 2:1 molar excess to HOPDA<sup>a</sup>

| Enzyme                   | $\lambda$ (nm) | Formation of ES <sup>red</sup> or ES <sup>planar</sup> |      |                          |      |                          |      | $\lambda_{\text{max}}$ (nm) | $t_{1/2}$ (h) |
|--------------------------|----------------|--------------------------------------------------------|------|--------------------------|------|--------------------------|------|-----------------------------|---------------|
|                          |                | $k_1$ (s <sup>-1</sup> )                               |      | $k_2$ (s <sup>-1</sup> ) |      | $k_3$ (s <sup>-1</sup> ) |      |                             |               |
|                          |                | [% Amp]                                                |      | [% Amp]                  |      | [% Amp]                  |      |                             |               |
| S112A <sup>b</sup>       | 492            | ~ 500                                                  | [85] | 76                       | [11] | 0.92                     | [4]  | 488 / 506                   | 4.4           |
| S112A/H265A <sup>b</sup> | 434            | 220                                                    | [69] | 22                       | [22] | 0.34                     | [9]  | 432                         | ND            |
| S112A/H265Q              | 434            | 114 ± 8                                                | [39] | 32 ± 2                   | [38] | 0.78 ± 0.02              | [22] | 432                         | 31            |

<sup>a</sup> – all rates are associated with increasing absorptivity at the stated wavelength.<sup>b</sup> – data was taken from Horsman *et al* (2007)<sup>2</sup>.

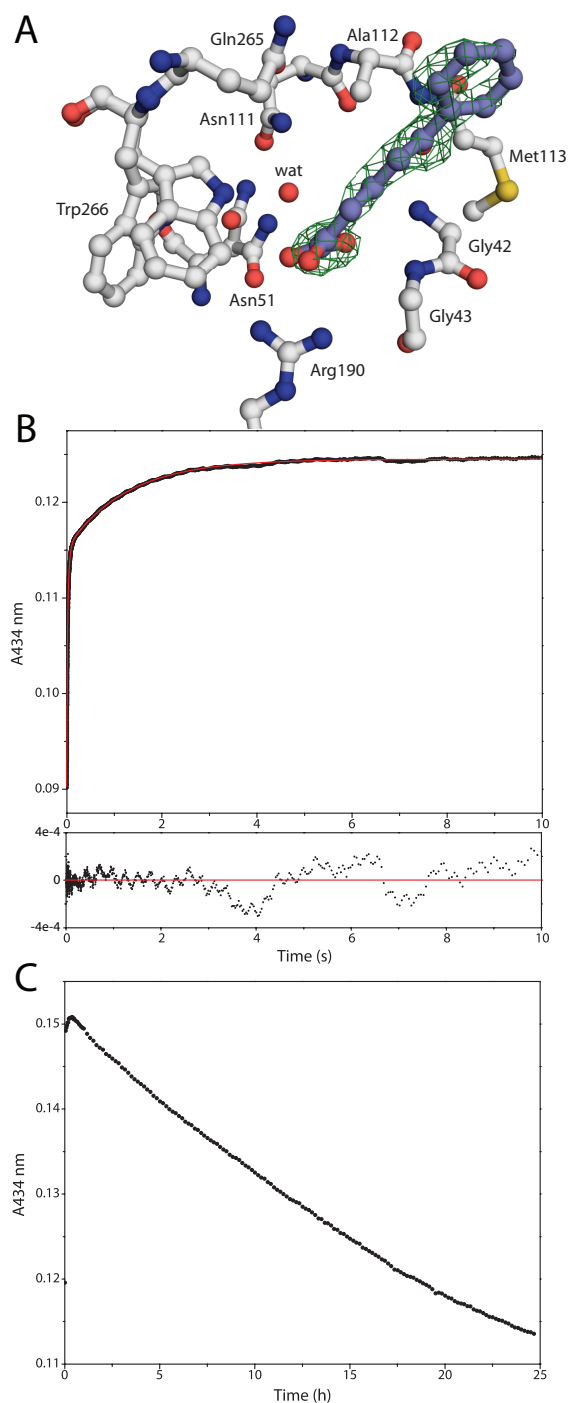

Figure S5. (A) Ball-and-stick representation of the BphD S112A/H265Q:HOPDA<sup>2-</sup> complex active site, including the unbiased Fo-Fc map (green) for the substrate, contoured at 3σ. Polar contacts are shown using dashed lines. Hydrophobic interactions between the ligand and Ala112, Gly138, Ile153, Leu156, Phe175, Leu213, Trp216, Val240, and Trp 266 have been omitted for simplicity. (B) Representative stopped-flow replicate showing the binding of HOPDA<sup>2-</sup> to S112A/H265Q in potassium phosphate (I = 0.1 M), pH 7.5 at 25 °C. (C) Representative trace used for estimating the half-life of the S112A/H265Q:HOPDA<sup>2-</sup> complex.

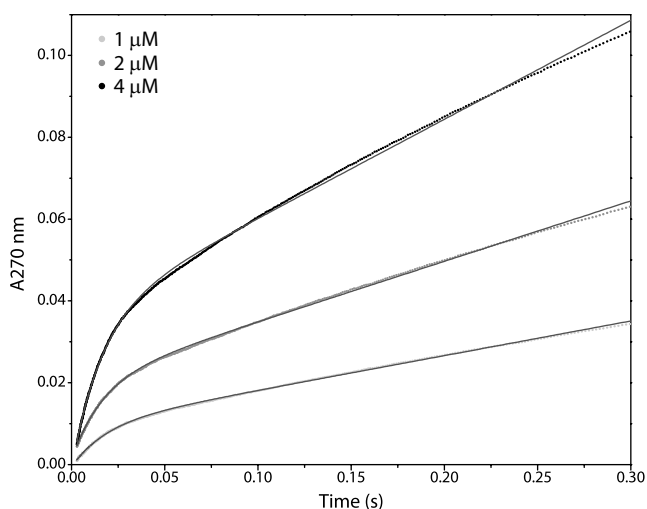

Figure S6. Representative stopped-flow experiments demonstrating a pre-steady state burst of HPD formation by BphD WT in potassium phosphate buffer ( $I = 0.1$  M), pH 7.5 at 25 °C. The slight divergence from linearity in the traces can be explained by substrate depletion, which was  $\sim 18\%$  after 0.5 s at 4  $\mu\text{M}$  enzyme. Consequently, product accumulation and inhibition ( $K_{\text{ic HPD}} \sim 80$   $\mu\text{M}$ ,  $K_{\text{iu HPD}} \sim 120$   $\mu\text{M}$ ,  $K_{\text{ic benzoate}} \sim 160$   $\mu\text{M}$ ), and non-enzymatic enolization of HPD, associated with a decay of the signal at 270 nm ( $k \sim 0.6$   $\text{s}^{-1}$ ), likely accounts for the reduction in the apparent steady-state rate with increasing enzyme concentration<sup>3</sup>.

Table S7. Estimated transition state stabilization by the binding energy of MCP hydrolase side chains to HOPDA.

| Enzyme                 | $k_{\text{cat}}/K_{\text{m}}$ ( $\text{M}^{-1}\text{s}^{-1}$ ) | $ \Delta G_{\text{R}} $<br>( $\text{kcal mol}^{-1}$ ) | Ref |
|------------------------|----------------------------------------------------------------|-------------------------------------------------------|-----|
| BphD wild type, pH 7.5 | $3.2 \times 10^6$                                              |                                                       | 4   |
| S112C                  | $9.5 \times 10^4$                                              | 2.1                                                   | 3   |
| BphD wild-type, pH 8.0 | $3.3 \times 10^6$                                              |                                                       | 5   |
| R190Q                  | $5.7 \times 10^2$                                              | 5.1                                                   | 5   |
| R190K                  | $2.8 \times 10^3$                                              | 4.2                                                   | 5   |
| MhpC, pH 8.0           | $4.1 \times 10^6$                                              |                                                       | 5   |
| N109A                  | $3.3 \times 10^4$                                              | 2.9                                                   | 5   |
| N109H                  | $1.9 \times 10^4$                                              | 3.2                                                   | 5   |
| F173G                  | $1.3 \times 10^4$                                              | 2.0                                                   | 5   |
| F173D                  | $2.6 \times 10^4$                                              | 3.0                                                   | 5   |
| R188Q                  | $1.4 \times 10^3$                                              | 4.7                                                   | 5   |
| R188K                  | $1.9 \times 10^4$                                              | 3.2                                                   | 5   |
| C261A                  | $2.9 \times 10^6$                                              | 0.2                                                   | 5   |
| W264G                  | $2.1 \times 10^4$                                              | 3.1                                                   | 5   |

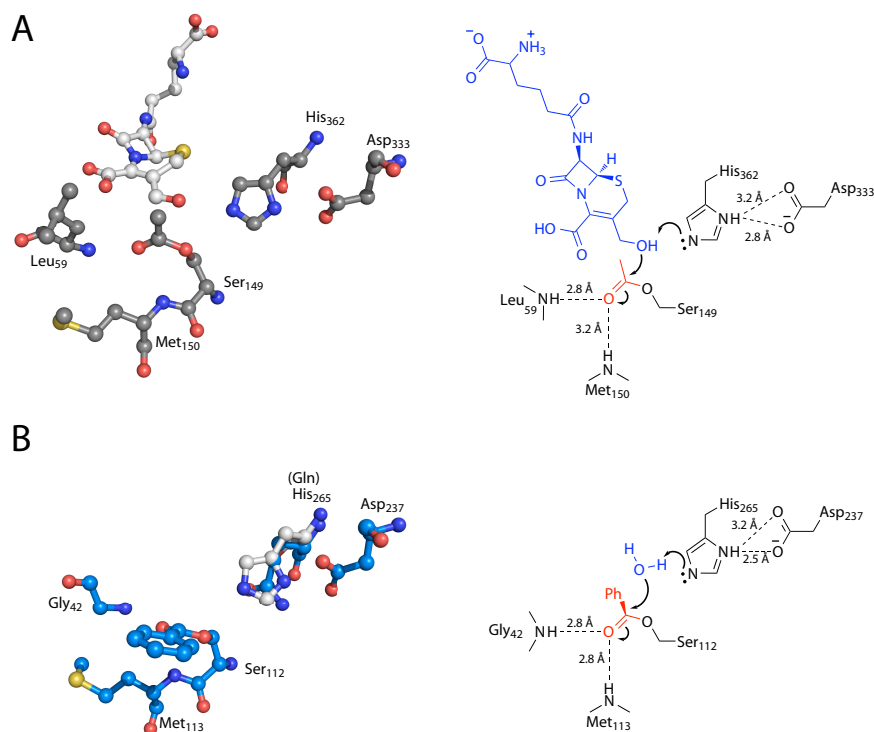

Figure S7. (A) *Left*. Ball-and-stick representation of the acetylated DAC-AT:deacetylcephalosporin C active site (PDB ID: 2VAV Chain L<sup>6</sup>). *Right*. Interpretation of the chemical reaction leading to acetylation by DAC-AT. (B) *Left*. Ball-and-stick representation of the benzoylated BphD H265Q active site, and superposition of His265 from 2OG1 chain B. *Right*. By analogy, the activation of water by the His-Asp dyad is drawn in context of the MCP-hydrolase mechanism.

## REFERENCES

1. Wilkinson, A. J.; Fersht, A. R.; Blow, D. M.; Winter, G., *Biochemistry* **1983**, 22 (15), 3581-6.
2. Horsman, G. P.; Bhowmik, S.; Seah, S. Y.; Kumar, P.; Bolin, J. T.; Eltis, L. D., *J Biol Chem* **2007**, 282 (27), 19894-904.
3. Horsman, G. P.; Ke, J.; Dai, S.; Seah, S. Y.; Bolin, J. T.; Eltis, L. D., *Biochemistry* **2006**, 45 (37), 11071-86.
4. Bhowmik, S.; Horsman, G. P.; Bolin, J. T.; Eltis, L. D., *J Biol Chem* **2007**, 282 (50), 36377-85.
5. Li, C.; Li, J. J.; Montgomery, M. G.; Wood, S. P.; Bugg, T. D., *Biochemistry* **2006**, 45 (41), 12470-9.
6. Lejon, S.; Ellis, J.; Valegard, K., *J Mol Biol* **2008**, 377 (3), 935-44.
